# Supplementary material for: Growth of NiAl‐Layered Double Hydroxide on Graphene toward Excellent Anticorrosive Microwave Absorption Application
Source: PubMed Central journal article supplement (PMC7927622; doi:10.1002/advs.202002658), 2021-01-06

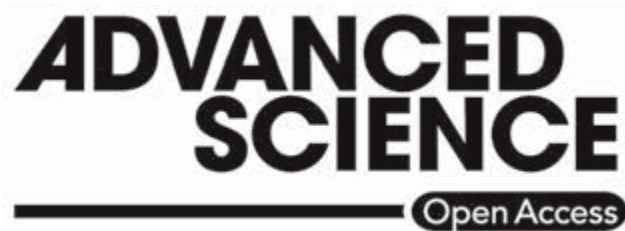

## Supporting Information

for *Adv. Sci.*, DOI: 10.1002/adv.202002658

Growth of NiAl Layered Double Hydroxide on Graphene for  
Application as an Excellent Anticorrosive Microwave Absorber

*Xuefei Xu, Shaohua Shi, Yulin Tang, Guizhen Wang\*, Maofan Zhou, Guoqing Zhao, Xuechun Zhou, Shiwei Lin, Fanbin Meng\**

## Supporting Information

### **Growth of NiAl Layered Double Hydroxide on Graphene for Application as an Excellent Anticorrosive Microwave Absorber**

*Xuefei Xu, Shaohua Shi, Yulin Tang, Guizhen Wang\*, Maofan Zhou, Guoqing Zhao, Xuechun Zhou, Shiwei Lin, Fanbin Meng\**

X Xu, Dr. S Shi, Y Tang, M Zhou, G Zhao, X Zhou, Prof. G Wang, Prof. S Lin. State Key Laboratory of Advanced Materials of Tropical Island Resources (Ministry of Education), Hainan University, Haikou, Hainan, 570228, P.R. China.

Prof. F Meng, State Key Laboratory of Advanced Technologies of Materials (Ministry of Education), School of Materials Science and Engineering, Southwest Jiaotong University, Chengdu, Sichuan, 610031, P.R. China.

E-mail: wangguizhen@hainanu.edu wangguizhen0@hotmail.com (Guizhen Wang),  
mengfanbin\_wing@126.com (Fanbin Meng)

The reflection loss values of as-prepared samples were researched according to the transmission line theory:

$$Z_{in} = Z_0 \left( \frac{\mu_r}{\varepsilon_r} \right) \tanh \left[ j \left( \frac{2\pi f d}{c} \right) (\mu_r \varepsilon_r)^{\frac{1}{2}} \right] \#(1)$$

$$RL = 20 \text{Log} \left| \frac{Z_{in} - Z_0}{Z_{in} + Z_0} \right| \#(2)$$

where  $Z_{in}$  is the input impedance of the absorber,  $Z_0$  the impedance of free space,  $\mu_r$  the relative complex permeability,  $\varepsilon_r$  the complex permittivity,  $f$  the frequency of microwaves,  $c$  the velocity of light, and  $d$  the thickness of the absorber.

The attenuation constant ( $\alpha$ ) was calculated by following equation:

$$\alpha = \frac{\sqrt{2}\pi f}{c} \times \sqrt{(\mu''\varepsilon'' - \mu'\varepsilon') + \sqrt{(\mu''\varepsilon'' - \mu'\varepsilon')^2 + (\mu'\varepsilon'' + \mu''\varepsilon')^2}} \#(3)$$

The impedance matching can be expressed as the equation:

$$Z = \frac{Z_{in}}{Z_0} = \sqrt{\left| \frac{\mu_r}{\varepsilon_r} \right|} \tanh \left[ j \left( \frac{2\pi f d}{c} \right) \sqrt{\mu_r \varepsilon_r} \right] \#(4)$$

Where  $Z_{in}$  is the impedance of microwave absorber and  $Z_0$  is the impedance of free space.

When the  $Z$  value is close to 1, microwave can enter into the absorber easily and then be converted to thermal or other energy.

The effective permittivity ( $\varepsilon_{eff}^{MG}$ ) of them is highly dependent on the, which can be measured as the following equation:

$$\varepsilon_{eff}^{MG} = \varepsilon_1 \frac{(\varepsilon_2 + 2\varepsilon_1) + 2f_v(\varepsilon_2 - \varepsilon_1)}{(\varepsilon_2 + 2\varepsilon_1) - f_v(\varepsilon_2 - \varepsilon_1)} \#(5)$$

Where  $\varepsilon_1$  is permittivity of the solid,  $\varepsilon_2$  permittivity of the void and  $f_v$  the pore volumes.

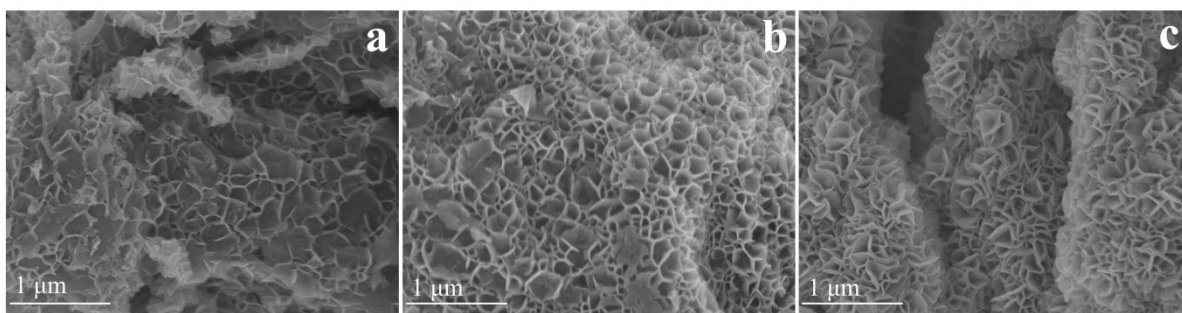

**Figure S1.** SEM images of (a) 50 NiAl-LDH/G, (b) 100 NiAl-LDH/G and (c) 150 NiAl-LDH/G.

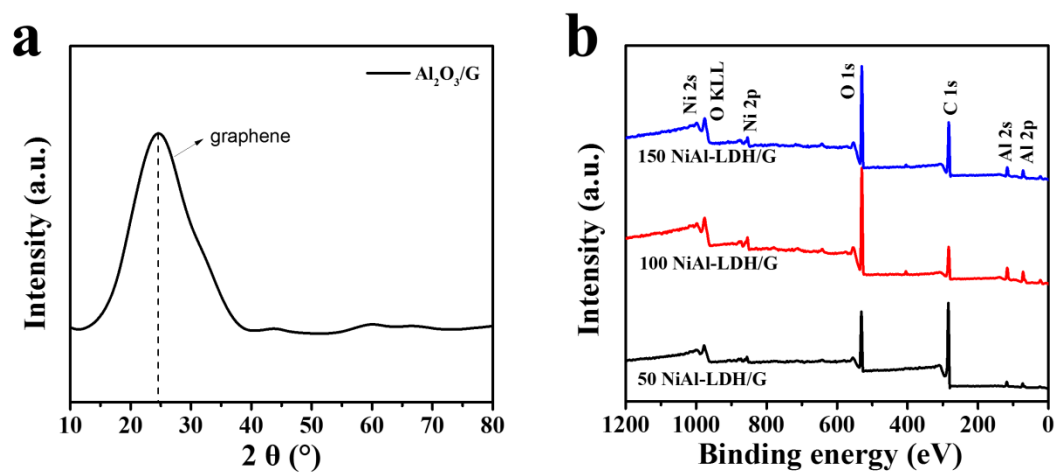

**Figure S2.** (a) XRD pattern of Al<sub>2</sub>O<sub>3</sub>/G. (b) XPS spectra of NiAl-LDH/G samples.

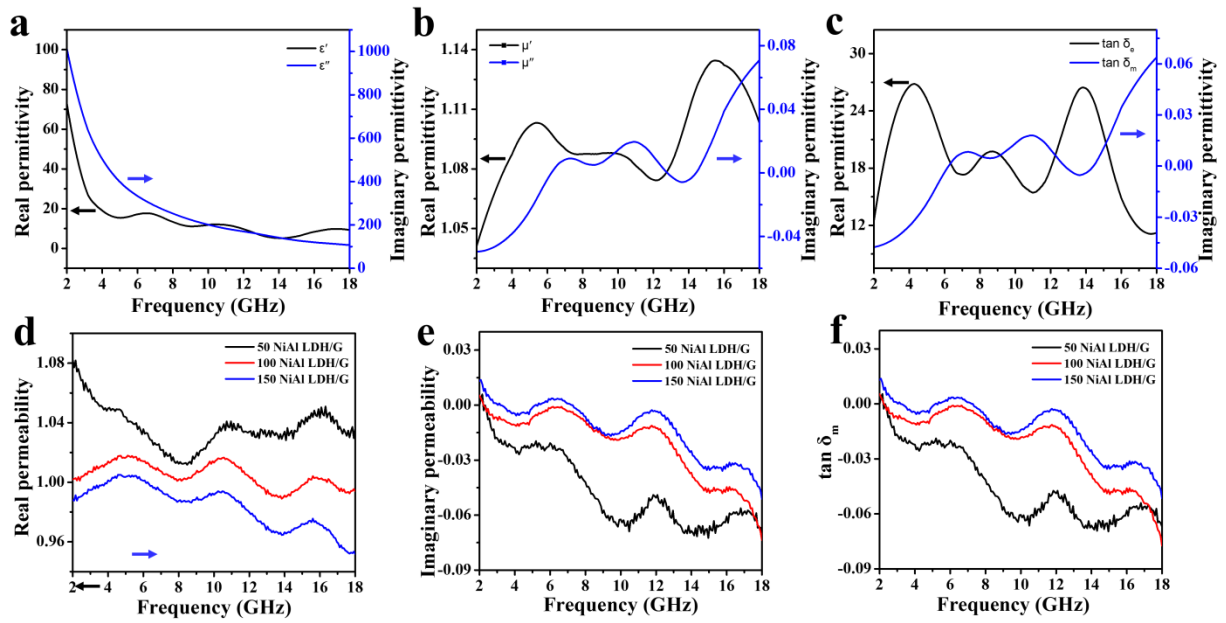

**Figure S3.** The frequency dependence of (a) real permittivity ( $\epsilon'$ ) and imaginary permittivity ( $\epsilon''$ ), (b) real permeability ( $\mu'$ ) and imaginary permeability ( $\mu''$ ), (c) dielectric loss tangent ( $\tan \delta_e$ ) and Magnetic loss tangent ( $\tan \delta_m$ ) of graphene. The frequency dependence of (d) real permeability ( $\mu'$ ), (e) imaginary permeability ( $\mu''$ ) and (f) magnetic loss tangent ( $\tan \delta_m$ ) of NiAl-LDH/G samples.

**Table S1.** The electrochemical parameters fitted from EIS results of pure epoxy coated steel after immersion of different time.

| Epoxy   | $R_{sol}$ ( $\Omega$<br>$cm^2$ ) | $CPE_{pro}$                                    |     | $R_{pro}$ ( $\Omega$<br>$cm^2$ ) | $CPE_{dl}$                                     |     | $R_{ct}$ ( $K\Omega$<br>$cm^2$ ) | $\chi^2$             |
|---------|----------------------------------|------------------------------------------------|-----|----------------------------------|------------------------------------------------|-----|----------------------------------|----------------------|
|         |                                  | $Y_0$<br>( $10^{-5} \Omega^{-1} cm^{-2} s^n$ ) | n   |                                  | $Y_0$<br>( $10^{-5} \Omega^{-1} cm^{-2} s^n$ ) | n   |                                  |                      |
| 1 day   | 49.1±0.4                         | 12.0±1.1                                       | 0.6 | 25.9±3.3                         | 3.7±0.6                                        | 0.8 | 5.3±0.1                          | 1.2×10 <sup>-3</sup> |
| 3 days  | 47.7±0.4                         | 10.1±0.4                                       | 0.7 | 23.2±2.6                         | 4.7±0.2                                        | 0.8 | 5.2±0.1                          | 1.3×10 <sup>-3</sup> |
| 5 days  | 48.6±0.4                         | 10.5±1.2                                       | 0.7 | 33.4±4.0                         | 3.8±0.7                                        | 0.8 | 4.5±0.1                          | 9.3×10 <sup>-4</sup> |
| 7 days  | 50.5±0.4                         | 10.1±0.9                                       | 0.6 | 40.4±6.4                         | 3.9±0.9                                        | 0.8 | 4.6±0.1                          | 7.7×10 <sup>-4</sup> |
| 14 days | 48.2±0.2                         | 11.5±0.5                                       | 0.7 | 50.6±7.2                         | 3.5±0.7                                        | 0.9 | 4.7±0.2                          | 4.1×10 <sup>-4</sup> |
| 21 days | 50.2±0.3                         | 8.9±0.8                                        | 0.7 | 80.1±10.6                        | 1.6±0.4                                        | 0.9 | 2.9±0.2                          | 4.1×10 <sup>-4</sup> |

**Table S2.** The electrochemical parameters fitted from EIS results of 7 wt.% NiAl-LDH/G coated steel after immersion of different time.

| LDH/G   | $R_{sol} (\Omega \text{ cm}^2)$ | $CPE_{pro}$                                                    |     | $R_{pro} (\Omega \text{ cm}^2)$ | $CPE_{LG}$                                                     |     | $R_{LG} (\Omega \text{ cm}^2)$ | $CPE_{dl}$                                                        |     | $R_{ct} (K\Omega \text{ cm}^2)$ | $\chi^2$             |
|---------|---------------------------------|----------------------------------------------------------------|-----|---------------------------------|----------------------------------------------------------------|-----|--------------------------------|-------------------------------------------------------------------|-----|---------------------------------|----------------------|
|         |                                 | $Y_0$<br>( $10^{-8} \Omega^{-1} \text{ cm}^{-2} \text{ s}^n$ ) | n   |                                 | $Y_0$<br>( $10^{-5} \Omega^{-1} \text{ cm}^{-2} \text{ s}^n$ ) | n   |                                | $Y_{c0}$<br>( $10^{-5} \Omega^{-1} \text{ cm}^{-2} \text{ s}^n$ ) | n   |                                 |                      |
| 1 day   | 71.0±2.1                        | 13.2±2.3                                                       | 0.6 | 26.1±1.7                        | 10.1±1.0                                                       | 0.6 | 303.9±26.9                     | 6.9±0.9                                                           | 0.8 | 10.7±0.2                        | $1.2 \times 10^{-3}$ |
| 3 days  | 60.3±2.2                        | 7.4±1.1                                                        | 0.6 | 31.5±1.7                        | 10.7±0.8                                                       | 0.6 | 319.9±24.6                     | 6.7±0.6                                                           | 0.8 | 12.4±0.2                        | $7.5 \times 10^{-4}$ |
| 5 days  | 68.9±2.5                        | 6.0±0.6                                                        | 0.7 | 60.0±2.0                        | 14.0±1.0                                                       | 0.6 | 352.3±34.6                     | 6.5±0.9                                                           | 0.8 | 10.4±0.2                        | $8.7 \times 10^{-4}$ |
| 7 days  | 54.7±1.5                        | 11.2±1.3                                                       | 0.7 | 28.3±1.2                        | 14.9±1.0                                                       | 0.6 | 296.6±33.9                     | 6.2±0.9                                                           | 0.9 | 10.3±0.2                        | $7.7 \times 10^{-4}$ |
| 14 days | 37.2±0.8                        | 16.2±1.7                                                       | 0.8 | 18.1±0.7                        | 16.3±0.7                                                       | 0.7 | 425.3±48.1                     | 4.2±0.6                                                           | 0.9 | 8.7±0.1                         | $5.4 \times 10^{-4}$ |
| 21 days | 39.5±0.9                        | 11.3±0.9                                                       | 0.6 | 25.2±0.8                        | 16.3±0.7                                                       | 0.7 | 546.7±72.0                     | 3.2±0.6                                                           | 0.9 | 7.9±0.1                         | $3.6 \times 10^{-4}$ |

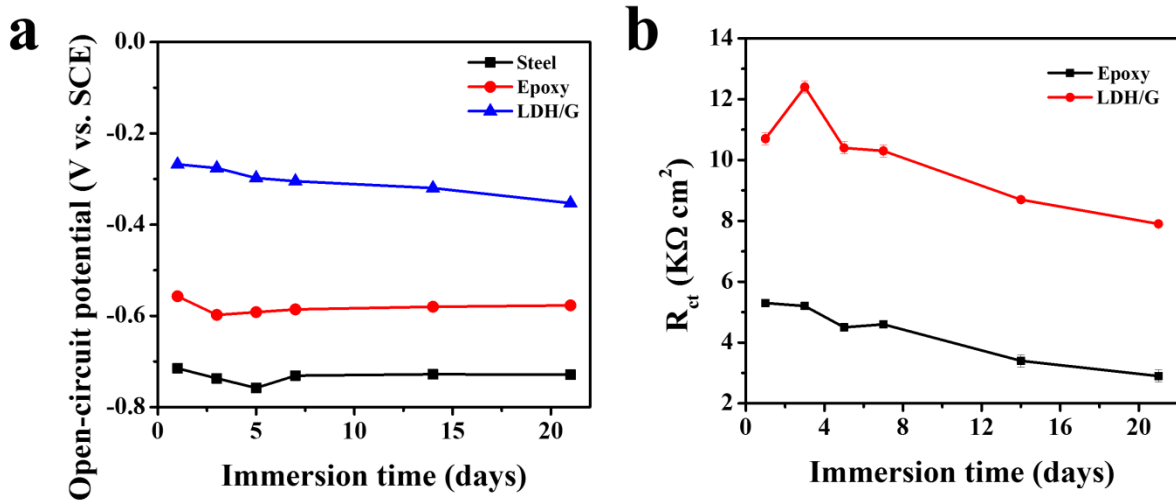

**Figure S4.** (a) Evolution of OCP values for bare steel, pure epoxy coated steel and 7 wt.% NiAl-LDH/G coated steel with continuous immersion of 21 days.

**Table S3.** The parameters fitted from tafel plots results in Figure 8h.

| samples | $E_{\text{corr}}$ (mV) | $i_{\text{corr}}$ (mA/cm <sup>2</sup> ) | $b_a$ (mV/dec) | $b_c$ (mV/dec) |
|---------|------------------------|-----------------------------------------|----------------|----------------|
| Steel   | - 926                  | $1.2 \times 10^{-2}$                    | 4225           | - 1988         |
| Epoxy   | - 667                  | $1.1 \times 10^{-2}$                    | 4766           | - 4852         |
| LDH/G   | - 381                  | $1.0 \times 10^{-2}$                    | 5854           | - 5554         |

The corrosion process on the surface of bare carbon steel:

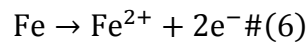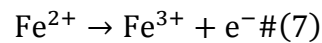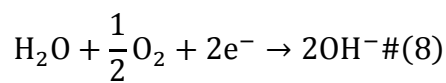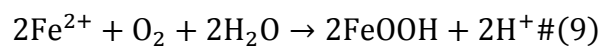



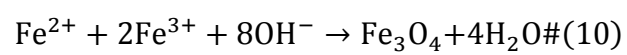

Supplement: ADVS-8-2002658-s001.pdf [file ADVS-8-2002658-s001.pdf]
